# Supplementary figures and images for: Photo-induced phosphate released from organic phosphorus degradation in deionized and natural water
Source: Royal Society of Chemistry journal article supplement (doi:10.1039/c6pp00313c), 2016-11-23

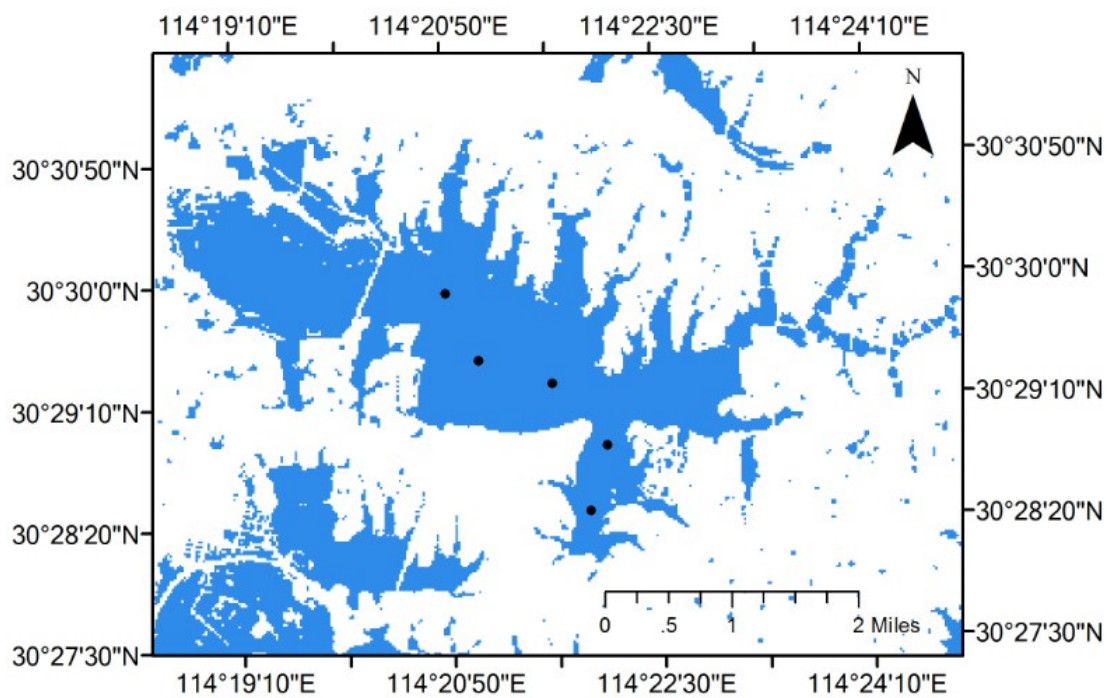

**Fig. S1** Water sample sites in Lake Nahu.

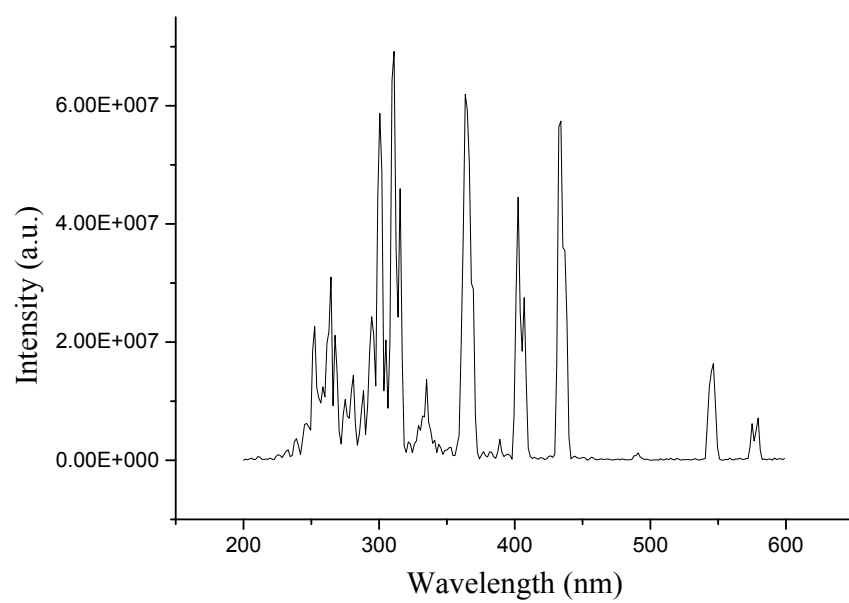

Fig. S2 Spectral irradiance of mercury lamp.

Supplement: c6pp00313c1.pdf [file c6pp00313c1.pdf]
